# Supplementary material for: The wild strawberry kinome: identification, classification and transcript profiling of protein kinases during development and in response to gray mold infection
Source: PubMed Central journal article supplement (PMC7490889; doi:10.1186/s12864-020-07053-4), 2020-09-14

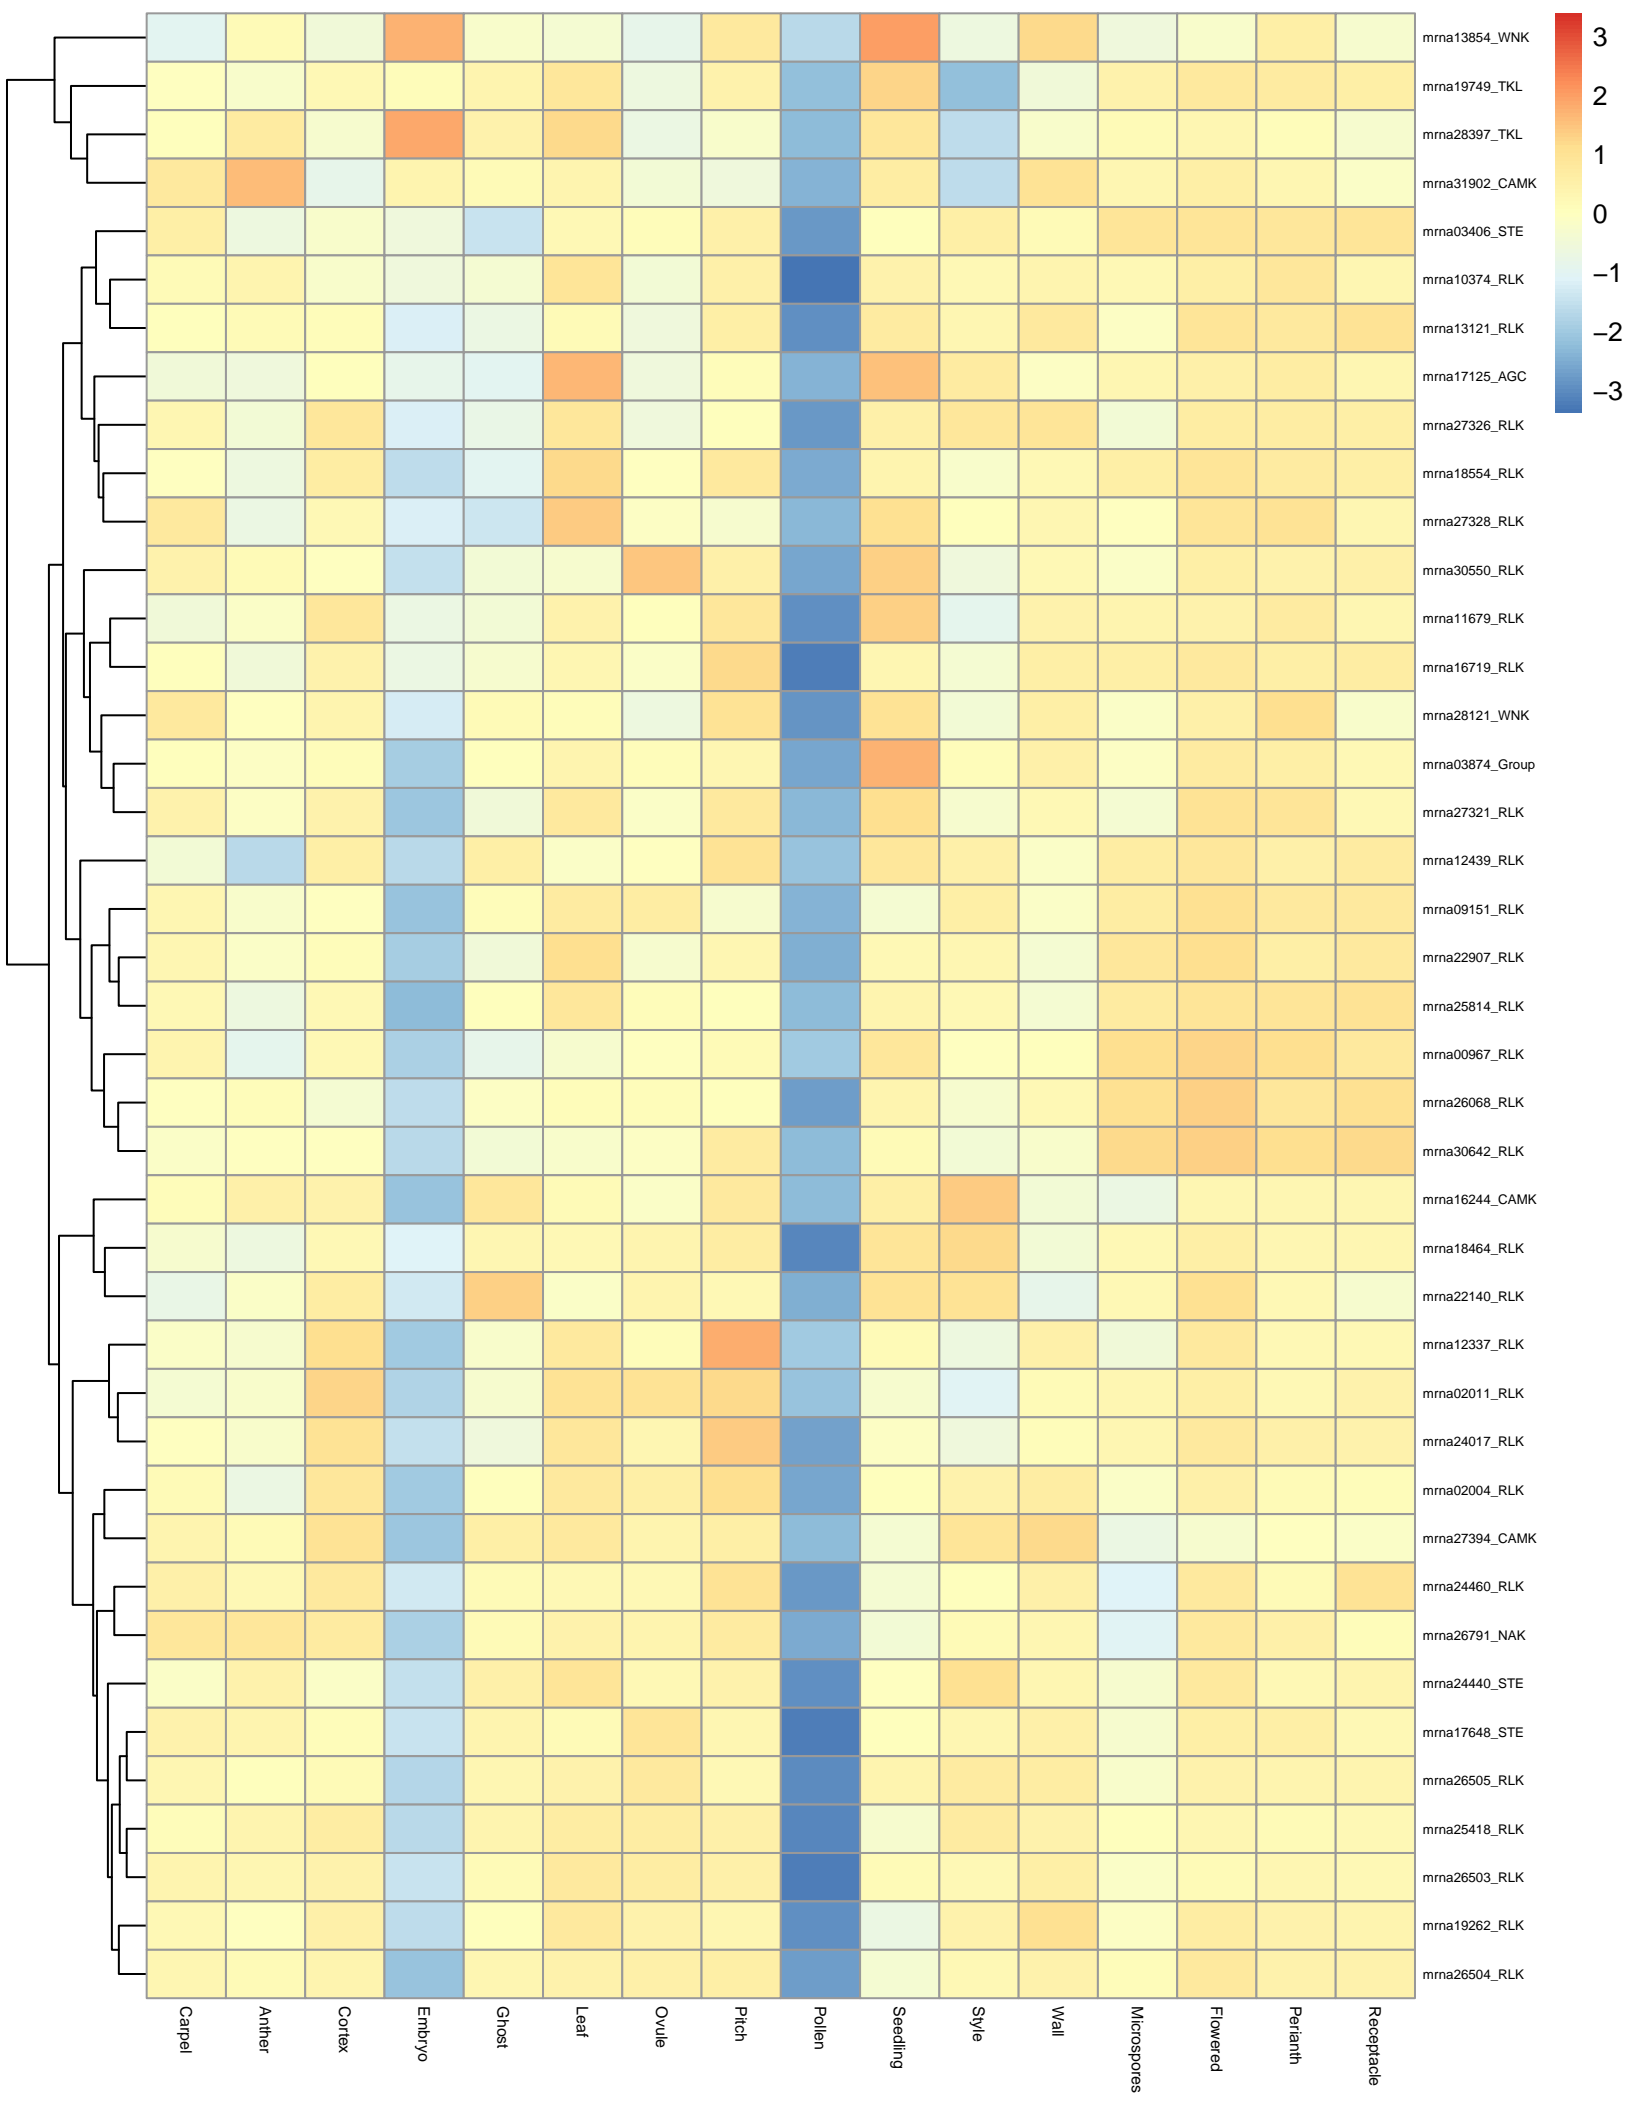

Supplement: 12864_2020_7053_MOESM13_ESM.pdf [file 12864_2020_7053_MOESM13_ESM.pdf]
